# Supplementary material for: Anxiety and Gastrointestinal Symptoms Related to COVID-19 during Italian Lockdown
Source: PubMed Central journal article supplement (PMC8001711; doi:10.3390/jcm10061221), 2021-03-16
Supplement: jcm-10-01221-s001.pdf [file jcm-10-01221-s001.pdf]

# Supplementary Material

## Anxiety and Gastrointestinal Symptoms related to COVID-19 during Italian Lockdown

Ludovico Abenavoli <sup>1,\*</sup>, Pietro Cinaglia <sup>2</sup>, Giuditta Lombardo <sup>3</sup>, Eduardo Boffoli <sup>4</sup>, Miriam Scida <sup>4</sup>, Anna Caterina Procopio <sup>1</sup>, Tiziana Larussa <sup>1</sup>, Luigi Boccuto <sup>5</sup>, Christian Zanza <sup>6,7</sup>, Yaroslava Longhitano <sup>7</sup>, Sharmila Fagoonee <sup>8</sup>, and Francesco Luzza <sup>1</sup>

<sup>1</sup> Department of Health Sciences, University “Magna Graecia” Catanzaro, Italy; l.abenavoli@unicz.it (L.A.), procopioannacaterina@gmail.com (A.C.P.), tiziana.larussa@gmail.com (T.L.), luzza@unicz.it (F.L.)

<sup>2</sup> Department of Surgical and Medical Sciences, University “Magna Graecia”, Catanzaro, Italy; cinaglia@unicz.it (P.C.)

<sup>3</sup> Psychologist, Independent Researcher, Catanzaro, Italy; giuditta.lombardo@libero.it (G.L.)

<sup>4</sup> School of Medicine, University “Magna Graecia”, Catanzaro, Italy; eduardo.boffoli96@gmail.com (E.B.), scidamiriam0@gmail.com (S.M.)

<sup>5</sup> School of Nursing, College of Behavioral, Social and Health Sciences, Clemson University, Clemson, SC, USA; lboccut@clemson.edu (L.B.)

<sup>6</sup> Department of Anesthesia, Critical Care Medicine and Emergency Medicine, Michele and Pietro Ferrero Hospital, Verduno; Italy; christian.zanza@live.it (C.Z.)

<sup>7</sup> Department of Anesthesia and Critical Care Medicine, AON SS Antonio e Biagio e Cesare Arrigo, Alessandria, Italy; lon.yaro@gmail.com (Y.L.)

<sup>8</sup> Institute of Biostructure and Bioimaging, National Research Council, Molecular Biotechnology Center, Turin, Italy; sharmila.fagoonee@unito.it (S.F.)

\* Correspondence: l.abenavoli@unicz.it; Tel.: +39-0961-3694387

**Table S1.** The survey consists of the following main categories: socio-demographic characteristics, GISs and psychometric parameters.

| Category                          | Question                                                                                                                                                                                                                                                                                                         | Answer                                |
|-----------------------------------|------------------------------------------------------------------------------------------------------------------------------------------------------------------------------------------------------------------------------------------------------------------------------------------------------------------|---------------------------------------|
| Socio-demographic characteristics | Sex                                                                                                                                                                                                                                                                                                              | Male, Female                          |
|                                   | Age                                                                                                                                                                                                                                                                                                              | Free field                            |
|                                   | Nationality                                                                                                                                                                                                                                                                                                      | Free field                            |
|                                   | Marital status                                                                                                                                                                                                                                                                                                   | Single, Dating, Married, Divorced     |
|                                   | Educational level                                                                                                                                                                                                                                                                                                | Undergraduate, Graduate               |
|                                   | Region of residence                                                                                                                                                                                                                                                                                              | List of Italian Regions               |
|                                   | Do you live in your Region of residence?                                                                                                                                                                                                                                                                         | Yes, No                               |
| GISs: history                     | Where are you live actually?                                                                                                                                                                                                                                                                                     | List of Italian Regions               |
|                                   | Have you ever suffered from any of these ailments? Diarrhea, constipation, pain during defecation, blood in feces, nausea, vomit, indigestion, heartburn (pre-meal), heartburn (after-meal), stomachache, fullness and early satiety, hypophagia, hyperphagia, dyspepsia, abdominal inflation, abdominal cramps. | Yes, No for each symptom in the list. |
|                                   | Positive family history for a GISs.                                                                                                                                                                                                                                                                              | Yes, No                               |

|                                                                                 |                                        |                                                                                                                                                                                                                                                               |                                                                                             |                                                                          |
|---------------------------------------------------------------------------------|----------------------------------------|---------------------------------------------------------------------------------------------------------------------------------------------------------------------------------------------------------------------------------------------------------------|---------------------------------------------------------------------------------------------|--------------------------------------------------------------------------|
| BEFORE and DURING lockdown                                                      | GISs                                   | Diarrhea, constipation, pain during defecation, blood in feces, nausea, vomit, indigestion, heartburn (pre-meal), heartburn (after-meal), stomachache, fullness and early satiety, hypophagia, hyperphagia, dyspepsia, abdominal inflation, abdominal cramps. | Multiple-choice (Never, Rarely, Sometimes, Often, and Always) for each symptom in the list. |                                                                          |
|                                                                                 | Dietary habits                         | Food consumption of fruits/vegetables, meat, pasta, pizza, desserts, pre-cooked food, alcohol, soda, cheese, and sausages.                                                                                                                                    | Multiple-choice (Never, Rarely, Sometimes, Often, and Always) for each food in the list.    |                                                                          |
| BEFORE and DURING lockdown                                                      | Psychometric evaluation: anxiety level | Headache                                                                                                                                                                                                                                                      | Multiple-choice (Never, Rarely, Sometimes, and Often) for each question.                    |                                                                          |
|                                                                                 |                                        | Fainting or dizziness                                                                                                                                                                                                                                         |                                                                                             |                                                                          |
|                                                                                 |                                        | Chest pain or discomfort                                                                                                                                                                                                                                      |                                                                                             |                                                                          |
|                                                                                 |                                        | Back pain                                                                                                                                                                                                                                                     |                                                                                             |                                                                          |
|                                                                                 |                                        | Stomach pain and nausea                                                                                                                                                                                                                                       |                                                                                             |                                                                          |
|                                                                                 |                                        | Muscle aches                                                                                                                                                                                                                                                  |                                                                                             |                                                                          |
|                                                                                 |                                        | Shortness of breath                                                                                                                                                                                                                                           |                                                                                             |                                                                          |
|                                                                                 |                                        | Hot/Cold flash                                                                                                                                                                                                                                                |                                                                                             |                                                                          |
|                                                                                 |                                        | Lump in the throat                                                                                                                                                                                                                                            |                                                                                             |                                                                          |
|                                                                                 |                                        | Weakness                                                                                                                                                                                                                                                      |                                                                                             |                                                                          |
|                                                                                 |                                        | Feeling that your arms or legs are heavy                                                                                                                                                                                                                      |                                                                                             |                                                                          |
|                                                                                 |                                        | Abnormal sensations of numbness and tingling                                                                                                                                                                                                                  |                                                                                             |                                                                          |
|                                                                                 |                                        | I am concerned with health                                                                                                                                                                                                                                    |                                                                                             | Multiple-choice (Never, Rarely, Sometimes, and Often) for each question. |
|                                                                                 |                                        | I pay attention to the pains                                                                                                                                                                                                                                  |                                                                                             |                                                                          |
| I notice sensations or changes in my body                                       |                                        |                                                                                                                                                                                                                                                               |                                                                                             |                                                                          |
| I can keep myself from thinking about diseases                                  |                                        |                                                                                                                                                                                                                                                               |                                                                                             |                                                                          |
| I am afraid of having a serious disease                                         |                                        |                                                                                                                                                                                                                                                               |                                                                                             |                                                                          |
| I have mental images of myself sick                                             |                                        |                                                                                                                                                                                                                                                               |                                                                                             |                                                                          |
| I'm having trouble not thinking about my health                                 |                                        |                                                                                                                                                                                                                                                               |                                                                                             |                                                                          |
| If the doctor tells me I have nothing how much I keep thinking about it         |                                        |                                                                                                                                                                                                                                                               |                                                                                             |                                                                          |
| If I hear about a disease, I think I may have it too                            |                                        |                                                                                                                                                                                                                                                               |                                                                                             |                                                                          |
| If I feel a physical sensation or a change, I wonder what it means              |                                        |                                                                                                                                                                                                                                                               |                                                                                             |                                                                          |
| It is possible that I am ill with something serious                             |                                        |                                                                                                                                                                                                                                                               |                                                                                             |                                                                          |
| I always think I'm seriously sick                                               |                                        |                                                                                                                                                                                                                                                               |                                                                                             |                                                                          |
| If I notice a bodily sensation that I can't explain, how much I think about it? |                                        |                                                                                                                                                                                                                                                               |                                                                                             |                                                                          |
| My friends and family would say that I care about my health                     |                                        |                                                                                                                                                                                                                                                               |                                                                                             |                                                                          |

**Table S2.** Descriptive characteristics of the respondent cohort.

|                        |               |       |
|------------------------|---------------|-------|
| <b>Mean age (SD)</b>   | 23.93 (3.67)  |       |
| <b>Sex</b>             | Male          | 31.4% |
|                        | Female        | 68.6% |
| <b>Nationality</b>     | Italian       | 99.2% |
|                        | Polish        | 0.6%  |
|                        | Croatian      | 0.3%  |
| <b>Education level</b> | Undergraduate | 72.3% |
|                        | Graduate      | 27.7% |
| <b>Marital status</b>  | Single        | 48.0% |
|                        | Dating        | 49.2% |

|  |              |       |
|--|--------------|-------|
|  | Married      | 2.5%  |
|  | Divorced     | 0.3%  |
|  | Unknown      | 0.3   |
|  | Abruzzo      | 1.1   |
|  | Basilicata   | 1.4   |
|  | Calabria     | 48.0  |
|  | Campania     | 3.1   |
|  | Emilia       | 2.3   |
|  | Friuli       | 8.2   |
|  | Lazio        | 3.1   |
|  | Liguria      | 0.8   |
|  | Lombardy     | 4.8   |
|  | Marche       | 7.1   |
|  | Piedmont     | 1.1   |
|  | Apulia       | 5.4   |
|  | Sardinia     | 0.3   |
|  | Sicily       | 3.7   |
|  | Tuscany      | 1.7   |
|  | Trentino     | 0.6   |
|  | Veneto       | 7.1   |
|  | Resident     | 90.7% |
|  | Non-resident | 9.3%  |

**Region of residence**

**Status for the region where the subject lives**
